# Supplementary material for: Improved quantitative crystal-structure comparison using powder diffractograms via anisotropic volume correction
Source: Royal Society of Chemistry journal article supplement (doi:10.1039/d1ce01058a), 2021-01-01
Supplement: d1ce01058a1.pdf [file d1ce01058a1.pdf]

# Supplementary information for: Improved Quantitative Crystal-Structure Comparison using Powder Diffractograms via Anisotropic Volume Correction

R. Alex Mayo and Erin R. Johnson

## S1 Target Structures

Table S1: CCDC Identifiers for the BT6 target structures.

| Compound | Form | Identifier |
|----------|------|------------|
| XXII     | –    | 1451239    |
| XXIII    | A    | 1447522    |
| XXIII    | B    | 1447523    |
| XXIII    | C    | 1447524    |
| XXIII    | D    | 1447525    |
| XXIII    | E    | 1447526    |
| XXIV     | –    | 1447530    |
| XXV      | –    | 1447527    |
| XXVI     | –    | 1447529    |

## S2 Dataset

### S2.1 Lists removed from all BT6 submissions

Table S2: Lists of BT6 submissions removed prior to analysis.

| <i>Target-Group-List</i> | Reason                     |
|--------------------------|----------------------------|
| XXII-G03-L2              | structural duplicate of L1 |
| XXV-G03-L2               | structural duplicate of L1 |
| XXII-G07-L2              | structural duplicate of L1 |
| XXIII-G07-L2             | structural duplicate of L1 |
| XXV-G07-L2               | structural duplicate of L1 |
| XXII-G12-L1              | numerous issues            |
| XXII-G12-L2              | structural duplicate of L1 |
| XXVI-G14-L2              | structural duplicate of L1 |
| XXII-G25-L2              | structural duplicate of L1 |
| XXIII-G25-L2             | structural duplicate of L1 |

G14 submitted lists containing structures with  $Z' = 1$  only, and a mix of  $Z' = 1$  and  $Z' = 2$ , for compounds XXIII and XXVI. Only the list with the  $Z'$  value matching the target was used in each case to avoid double counting. Thus, comparisons with targets XXIIIA, XXIIIB, and XXIIID used XXIII-G14-L1 (only  $Z' = 1$ ). Comparisons with targets XXIIIC, and XXIIIE used XXIII-G14-L2 (mix of  $Z' = 1$  and  $Z' = 2$ ).

## S2.2 Data processing

Many groups submitted lists with problematic symmetry descriptions or errors in unit cell angles for the assigned crystal systems. Corrections were made following lists:

- XXII-G04-L1: symmetry descriptions (add `_symmetry_equiv_pos_site_id` between `loop_` and `_symmetry_equiv_pos_as_xyz`)
- XXV-G04-L1: symmetry descriptions (add `_symmetry_equiv_pos_site_id` between `loop_` and `_symmetry_equiv_pos_as_xyz`)
- XXVI-G04-L1: symmetry descriptions (add `_symmetry_equiv_pos_site_id` between `loop_` and `_symmetry_equiv_pos_as_xyz`)
- XXII-G05-L1: symmetry descriptions (add `loop_` and re-order elements in `_symmetry_equiv_pos_as_xyz`)
- XXIII-G05-L1: symmetry descriptions (add `loop_` and re-order elements in `_symmetry_equiv_pos_as_xyz`)
- XXIV-G05-L1: symmetry descriptions (add `loop_` and re-order elements in `_symmetry_equiv_pos_as_xyz`)
- XXV-G05-L1: symmetry descriptions (add `loop_` and re-order elements in `_symmetry_equiv_pos_as_xyz`)
- XXVI-G05-L1: symmetry descriptions (add `loop_` and re-order elements in `_symmetry_equiv_pos_as_xyz`)
- XXII-G06-L1: unit cells given a monoclinic space group without two right angles and/or an orthorhombic space group without all right angles
- XXII-G06-L2: unit cells given a monoclinic space group without two right angles and/or an orthorhombic space group without all right angles
- XXIII-G06-L2: unit cells given a monoclinic space group without two right angles and/or an orthorhombic space group without all right angles
- XXV-G06-L2: unit cells given a monoclinic space group without two right angles and/or an orthorhombic space group without all right angles
- XXVI-G06-L2: unit cells given a monoclinic space group without two right angles and/or an orthorhombic space group without all right angles
- XXII-G08-L2: unit cells given a monoclinic space group without two right angles and/or an orthorhombic space group without all right angles
- XXII-G20-L1: symmetry descriptions (missing, wrong space group H-M notation)
- XXII-G23-L1: unit cells given a monoclinic space group without two right angles and/or an orthorhombic space group without all right angles
- XXII-G25-L1: unit cells given a monoclinic space group without two right angles and/or an orthorhombic space group without all right angles
- XXIII-G25-L1: unit cells given a monoclinic space group without two right angles and/or an orthorhombic space group without all right angles
- XXIV-G25-L1: unit cells given a monoclinic space group without two right angles and/or an orthorhombic space group without all right angles
- XXV-G25-L1: unit cells given a monoclinic space group without two right angles and/or an orthorhombic space group without all right angles

### S3 Cell Transformation Matrices

Transformation matrices used in the structure screening:

Acute-angle triclinic cells:

$$\begin{array}{cccc}
 \begin{bmatrix} -1 & 1 & 0 \\ 0 & 1 & 0 \\ 0 & 0 & -1 \end{bmatrix} & \begin{bmatrix} 1 & -1 & 0 \\ 1 & 0 & 0 \\ 0 & 0 & -1 \end{bmatrix} & \begin{bmatrix} 1 & -1 & 0 \\ 0 & -1 & 0 \\ 0 & 0 & -1 \end{bmatrix} & \begin{bmatrix} -1 & 1 & 0 \\ -1 & 0 & 0 \\ 0 & 0 & -1 \end{bmatrix} \\
 \\
 \begin{bmatrix} 1 & 0 & 0 \\ 1 & -1 & 0 \\ 0 & 0 & -1 \end{bmatrix} & \begin{bmatrix} 0 & 1 & 0 \\ -1 & 1 & 0 \\ 0 & 0 & -1 \end{bmatrix} & \begin{bmatrix} -1 & 0 & 0 \\ -1 & 1 & 0 \\ 0 & 0 & -1 \end{bmatrix} & \begin{bmatrix} 0 & -1 & 0 \\ 1 & -1 & 0 \\ 0 & 0 & -1 \end{bmatrix} \\
 \\
 \begin{bmatrix} 1 & 0 & 0 \\ 0 & -1 & 0 \\ 1 & 0 & -1 \end{bmatrix} & \begin{bmatrix} 0 & 0 & 1 \\ 0 & -1 & 0 \\ -1 & 0 & 1 \end{bmatrix} & \begin{bmatrix} -1 & 0 & 0 \\ 0 & -1 & 0 \\ -1 & 0 & 1 \end{bmatrix} & \begin{bmatrix} 0 & 0 & -1 \\ 0 & -1 & 0 \\ 1 & 0 & -1 \end{bmatrix} \\
 \\
 \begin{bmatrix} -1 & 0 & 1 \\ 0 & -1 & 0 \\ 0 & 0 & 1 \end{bmatrix} & \begin{bmatrix} 1 & 0 & -1 \\ 0 & -1 & 0 \\ 1 & 0 & 0 \end{bmatrix} & \begin{bmatrix} 1 & 0 & -1 \\ 0 & -1 & 0 \\ 0 & 0 & -1 \end{bmatrix} & \begin{bmatrix} -1 & 0 & 1 \\ 0 & -1 & 0 \\ -1 & 0 & 0 \end{bmatrix} \\
 \\
 \begin{bmatrix} -1 & 0 & 0 \\ 0 & -1 & 1 \\ 0 & 0 & 1 \end{bmatrix} & \begin{bmatrix} -1 & 0 & 0 \\ 0 & 1 & -1 \\ 0 & 1 & 0 \end{bmatrix} & \begin{bmatrix} -1 & 0 & 0 \\ 0 & 1 & -1 \\ 0 & 0 & -1 \end{bmatrix} & \begin{bmatrix} -1 & 0 & 0 \\ 0 & -1 & 1 \\ 0 & -1 & 0 \end{bmatrix} \\
 \\
 \begin{bmatrix} -1 & 0 & 0 \\ 0 & 1 & 0 \\ 0 & 1 & -1 \end{bmatrix} & \begin{bmatrix} -1 & 0 & 0 \\ 0 & 0 & 1 \\ 0 & -1 & 1 \end{bmatrix} & \begin{bmatrix} -1 & 0 & 0 \\ 0 & -1 & 0 \\ 0 & -1 & 1 \end{bmatrix} & \begin{bmatrix} -1 & 0 & 0 \\ 0 & 0 & -1 \\ 0 & 1 & -1 \end{bmatrix}
 \end{array}$$

Obtuse-angle triclinic cells:

$$\begin{array}{cccc}
 \begin{bmatrix} 1 & 1 & 0 \\ 0 & -1 & 0 \\ 0 & 0 & -1 \end{bmatrix} & \begin{bmatrix} 1 & 1 & 0 \\ -1 & 0 & 0 \\ 0 & 0 & -1 \end{bmatrix} & \begin{bmatrix} -1 & -1 & 0 \\ 0 & 1 & 0 \\ 0 & 0 & -1 \end{bmatrix} & \begin{bmatrix} -1 & -1 & 0 \\ 1 & 0 & 0 \\ 0 & 0 & -1 \end{bmatrix} \\
 \\
 \begin{bmatrix} -1 & 0 & 0 \\ 1 & 1 & 0 \\ 0 & 0 & -1 \end{bmatrix} & \begin{bmatrix} 0 & -1 & 0 \\ 1 & 1 & 0 \\ 0 & 0 & -1 \end{bmatrix} & \begin{bmatrix} 1 & 0 & 0 \\ -1 & -1 & 0 \\ 0 & 0 & -1 \end{bmatrix} & \begin{bmatrix} 0 & 1 & 0 \\ -1 & -1 & 0 \\ 0 & 0 & -1 \end{bmatrix} \\
 \\
 \begin{bmatrix} -1 & 0 & 0 \\ 0 & -1 & 0 \\ 1 & 0 & 1 \end{bmatrix} & \begin{bmatrix} 0 & 0 & -1 \\ 0 & -1 & 0 \\ 1 & 0 & 1 \end{bmatrix} & \begin{bmatrix} 1 & 0 & 0 \\ 0 & -1 & 0 \\ -1 & 0 & -1 \end{bmatrix} & \begin{bmatrix} 0 & 0 & 1 \\ 0 & -1 & 0 \\ -1 & 0 & -1 \end{bmatrix} \\
 \\
 \begin{bmatrix} 1 & 0 & 1 \\ 0 & -1 & 0 \\ 0 & 0 & -1 \end{bmatrix} & \begin{bmatrix} 1 & 0 & 1 \\ 0 & -1 & 0 \\ -1 & 0 & 0 \end{bmatrix} & \begin{bmatrix} -1 & 0 & -1 \\ 0 & -1 & 0 \\ 0 & 0 & 1 \end{bmatrix} & \begin{bmatrix} -1 & 0 & -1 \\ 0 & -1 & 0 \\ 1 & 0 & 0 \end{bmatrix} \\
 \\
 \begin{bmatrix} -1 & 0 & 0 \\ 0 & 1 & 1 \\ 0 & 0 & -1 \end{bmatrix} & \begin{bmatrix} -1 & 0 & 0 \\ 0 & 1 & 1 \\ 0 & -1 & 0 \end{bmatrix} & \begin{bmatrix} -1 & 0 & 0 \\ 0 & -1 & -1 \\ 0 & 0 & 1 \end{bmatrix} & \begin{bmatrix} -1 & 0 & 0 \\ 0 & -1 & -1 \\ 0 & 1 & 0 \end{bmatrix} \\
 \\
 \begin{bmatrix} -1 & 0 & 0 \\ 0 & -1 & 0 \\ 0 & 1 & 1 \end{bmatrix} & \begin{bmatrix} -1 & 0 & 0 \\ 0 & 0 & -1 \\ 0 & 1 & 1 \end{bmatrix} & \begin{bmatrix} -1 & 0 & 0 \\ 0 & 1 & 0 \\ 0 & -1 & -1 \end{bmatrix} & \begin{bmatrix} -1 & 0 & 0 \\ 0 & 0 & 1 \\ 0 & -1 & -1 \end{bmatrix}
 \end{array}$$

Only the 12 matrices in the two left-most columns are used for monoclinic cells, as they become symmetric with the results from using the matrices in the two right-most columns in the monoclinic crystal system.

While some of these transformation matrices do not yield a determinant of 1, `critic2` is able to convert them to an appropriate transformation matrix. Alternative matrices than those shown here (other than the  $\det=1$  equivalents) are not viable as they will yield a unit cell that either 1) changes an angle from acute to obtuse or vice versa, 2) dramatically increases an axis length, or both simultaneously. Note that Niggli-reduced cells will have an obtuse angle for the non-right angle of a monoclinic cell, and will have all acute or all obtuse angles for a triclinic cell. Changing one angle from acute to obtuse (or vice versa) generates an incompatible unit cell for the developed volume correction.

Table S3: Transformation matrices applied to six structures identified as matches in BT6 in order to apply the anisotropic volume correction properly.

| Structure         | Transformation matrix |           |          |
|-------------------|-----------------------|-----------|----------|
| XXIIIB-G09-L1-E13 | [-1 0 0]              | [-1 1 0]  | [0 0 -1] |
| XXIIIB-G13-E88    | [-1 0 0]              | [-1 1 0]  | [0 0 -1] |
| XXIIIB-G15-E13    | [-1 0 0]              | [-1 1 0]  | [0 0 -1] |
| XXIIID-G06-L1-E73 | [1 0 0]               | [0 1 1]   | [0 -1 0] |
| XXV-G05-L1-E01    | [1 0 0]               | [-1 -1 0] | [0 0 -1] |
| XXVI-G06-L1-E08   | [-1 0 0]              | [-1 1 0]  | [0 0 -1] |

## S4 RMSD Drift from BT6 Results

Figure S1: Comparison of RMSD values reported in BT6 with those obtained in this work using the current version of Mercury. Results are shown for the unique structure matches, with the exceptions of XXIIID-G06-L1-E73 and XXIIIB-G09-L1-E66, as their RMSD values were not reported in BT6.

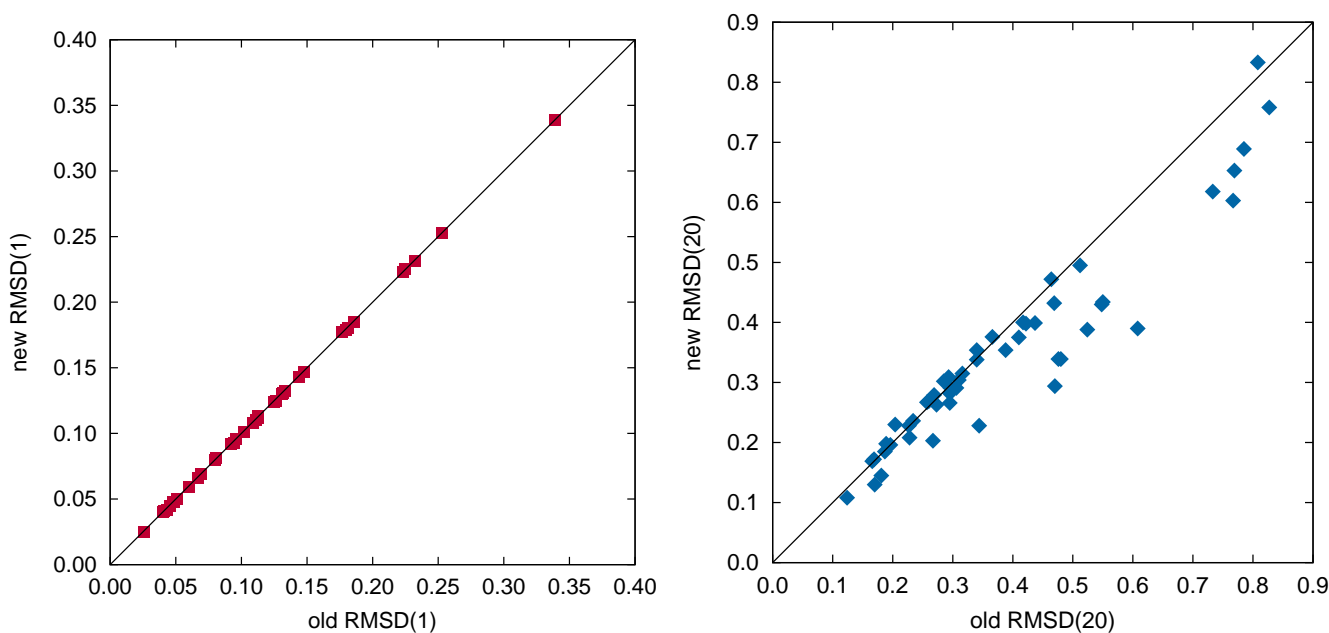

## S5 Dependence on COMPACK Options

Table S4: COMPACK results for structures submitted for compound XXIII that had a 180° rotation of the carboxylic acid group relative to the target. Tolerances are for both distances (%) and angles (°).

| Structure                        | RMSD(1) | VC-RMSD(1) | Raw-RMSD(20) | Tolerance | VC-RMSD(20) | Tolerance |
|----------------------------------|---------|------------|--------------|-----------|-------------|-----------|
| Ignoring H-atom and bond counts  |         |            |              |           |             |           |
| XXIIIA-G09-L1-E19                | 0.185   | 0.202      | 0.551        | 20        | 0.295       | 20        |
| XXIIIB-G06-L1-E26                | 0.162   | 0.155      | 0.442        | 20        | 0.183       | 20        |
| XXIIIB-G09-L1-E46                | 0.187   | 0.174      | 0.434        | 20        | 0.188       | 20        |
| XXIIIB-G14-L1-E89                | 0.089   | 0.080      | 0.192        | 20        | 0.090       | 20        |
| XXIIID-G06-L1-E73                | 0.220   | 0.261      | 0.747        | 20        | 0.321       | 20        |
| XXIIID-G06-L1-E75                | 0.220   | 0.261      | 0.747        | 20        | 0.321       | 20        |
| XXIIID-G09-L1-E66                | 0.239   | 0.211      | 0.603        | 20        | 0.269       | 20        |
| Including H-atom and bond counts |         |            |              |           |             |           |
| XXIIIA-G09-L1-E19                | 0.641   | 0.640      | 0.823        | 30        | 0.673       | 45        |
| XXIIIB-G06-L1-E26                | 0.633   | 0.622      | 0.754        | 65        | 0.629       | 65        |
| XXIIIB-G09-L1-E46                | 0.637   | 0.622      | 0.747        | 40        | 0.625       | 40        |
| XXIIIB-G14-L1-E89                | 0.625   | 0.624      | 0.648        | 50        | 0.625       | 50        |
| XXIIID-G06-L1-E73                | 0.651   | 0.651      | 0.967        | 65        | 0.679       | 60        |
| XXIIID-G06-L1-E75                | 0.651   | 0.651      | 0.967        | 65        | 0.679       | 60        |
| XXIIID-G09-L1-E66                | 0.658   | 0.639      | 0.860        | 40        | 0.661       | 40        |

## S6 Example Output Tables

Table S5: Example `vc-pwdf` output of structures that pass the unit-cell dimension criteria, when given a 10% deviation allowance from the reference structure.

| structure  | POWDIFF   | a     | b      | c      | alpha  | beta  | gamma | volume    | cryst_syst | spgrp  |
|------------|-----------|-------|--------|--------|--------|-------|-------|-----------|------------|--------|
| xx01_n.cif | 0.1020773 | 6.804 | 11.999 | 12.542 | 106.60 | 90    | 90    | 981.2685  | monoclinic | P2_1/c |
| xx47_n.cif | 0.2202693 | 6.841 | 12.384 | 12.653 | 108.49 | 90    | 90    | 1016.6664 | monoclinic | P2_1/c |
| xx71_n.cif | 0.3565806 | 6.909 | 12.387 | 13.206 | 116.23 | 90    | 90    | 1013.8525 | monoclinic | P2_1/c |
| xx10_n.cif | 0.4136432 | 7.197 | 11.567 | 12.142 | 90     | 95.31 | 90    | 1006.4558 | monoclinic | P2_1/c |
| xx22_n.cif | 0.4316918 | 6.369 | 12.347 | 13.411 | 96.86  | 90    | 90    | 1047.0647 | monoclinic | P2_1/c |
| xx07_n.cif | 0.4443281 | 7.202 | 10.952 | 12.716 | 97.51  | 90    | 90    | 994.3874  | monoclinic | P2_1/c |
| xx11_n.cif | 0.5544066 | 6.891 | 11.806 | 12.444 | 94.76  | 90    | 90    | 1008.8917 | monoclinic | P2_1/c |
| xx12_n.cif | 0.5583085 | 6.889 | 11.807 | 12.452 | 94.86  | 90    | 90    | 1009.1846 | monoclinic | P2_1/c |
| xx89_n.cif | 0.6110274 | 7.173 | 11.948 | 12.254 | 103.50 | 90    | 90    | 1021.1873 | monoclinic | P2_1/c |

Table S6: Example `vc-pwdf` output of structures that have undergone volume correction, ranked by VC-POWDIFF comparison to the target structure.

| structure     | POWDIFF   |
|---------------|-----------|
| xx01_n_VC.res | 0.0040872 |
| xx47_n_VC.res | 0.0196081 |
| xx22_n_VC.res | 0.2152266 |
| xx12_n_VC.res | 0.3274327 |
| xx11_n_VC.res | 0.3274816 |
| xx89_n_VC.res | 0.3918757 |
| xx71_n_VC.res | 0.4240894 |
| xx07_n_VC.res | 0.4399329 |

## S7 Effect of VC-POWDIFF Tolerance

Figure S2: Histograms of POWDIFF values for structures that pass step (3) of our computational algorithm, with different volume and cell-length tolerances selected. Results are shown for the sets of structures before (top) and after (bottom) anisotropic volume correction.

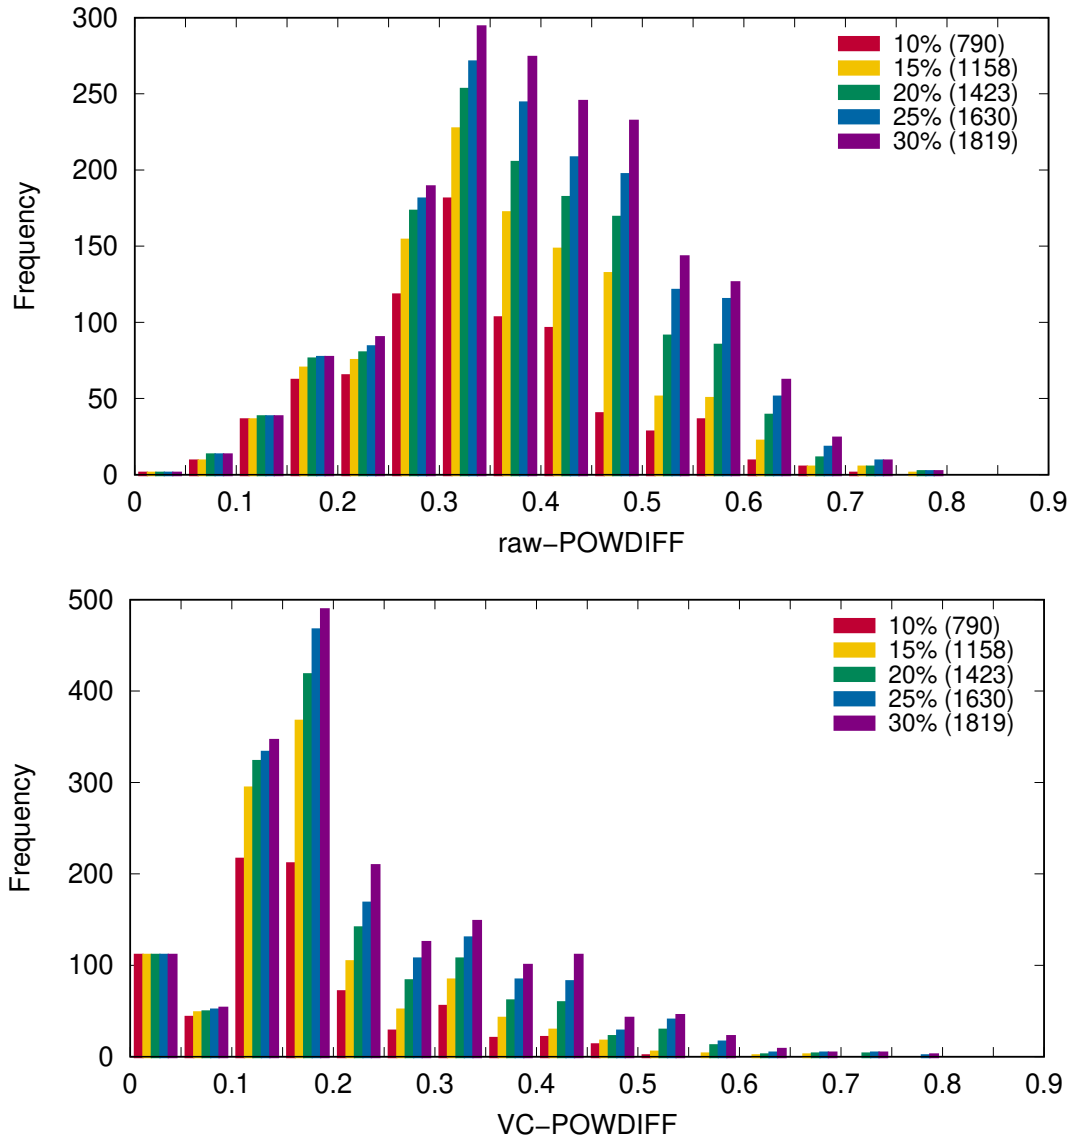

## S8 Effect of RMSD Tolerance

Figure S3: RMSD(20) values (before and after volume correction) as a function of the tolerance required to obtain a 20/20 molecule match with COMPACT. Results are only shown for cases in which the tolerances had to be increased beyond their default values (20% and 20°) to obtain a match. Increments of 5% and 5° were used when raising the tolerances.

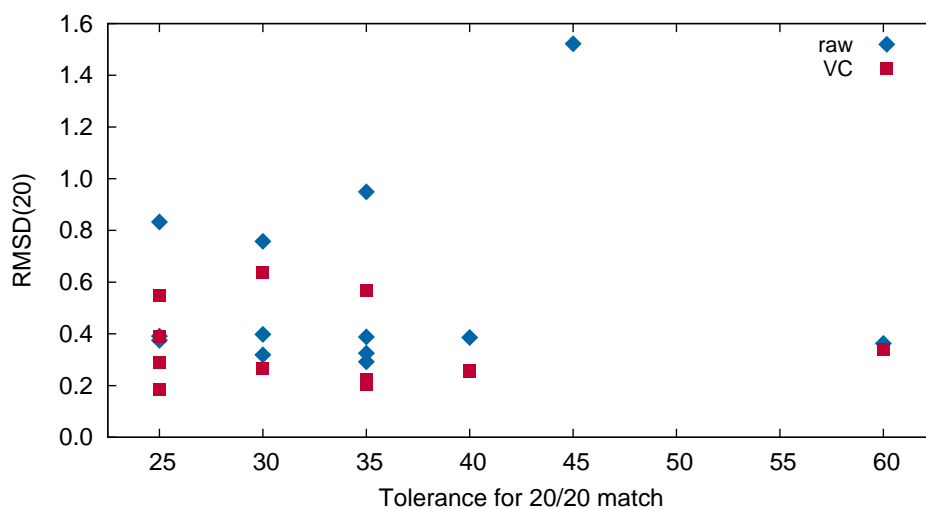

## S9 Effect of Volume Correction on RMSD(1)

Figure S4: RMSD(1) values for molecules before and after anisotropic volume correction. The  $y = x$  line is shown to highlight the roughly even numbers of structures where the RMSD(1) increases/decreases after volume correction.

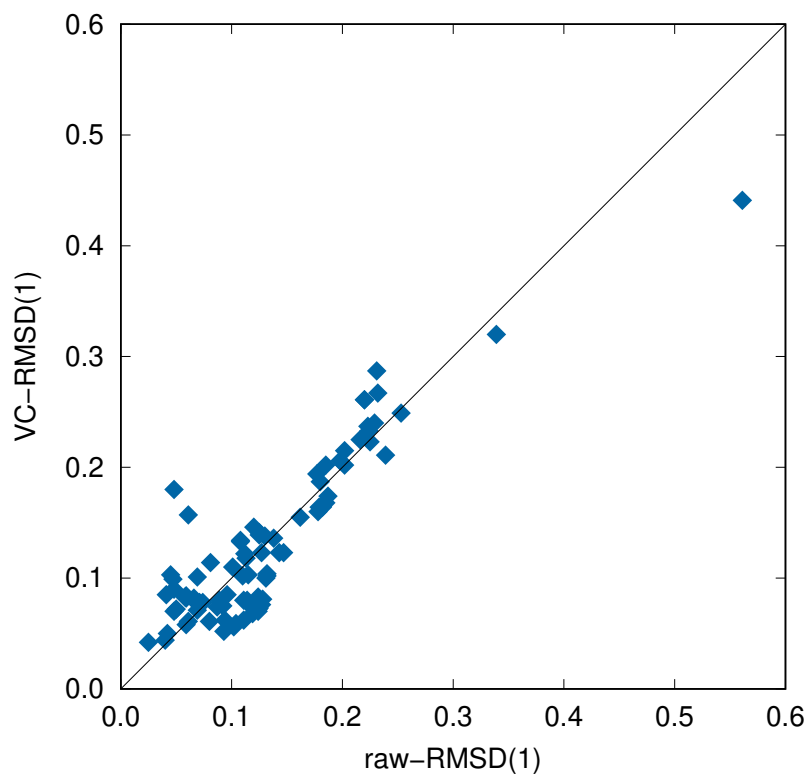



## S10 Correlations between RMSD(20) and POWDIFF Values

Figure S5: Correlations between various RMSD(20) and POWDIFF values for the 113-structure dataset.

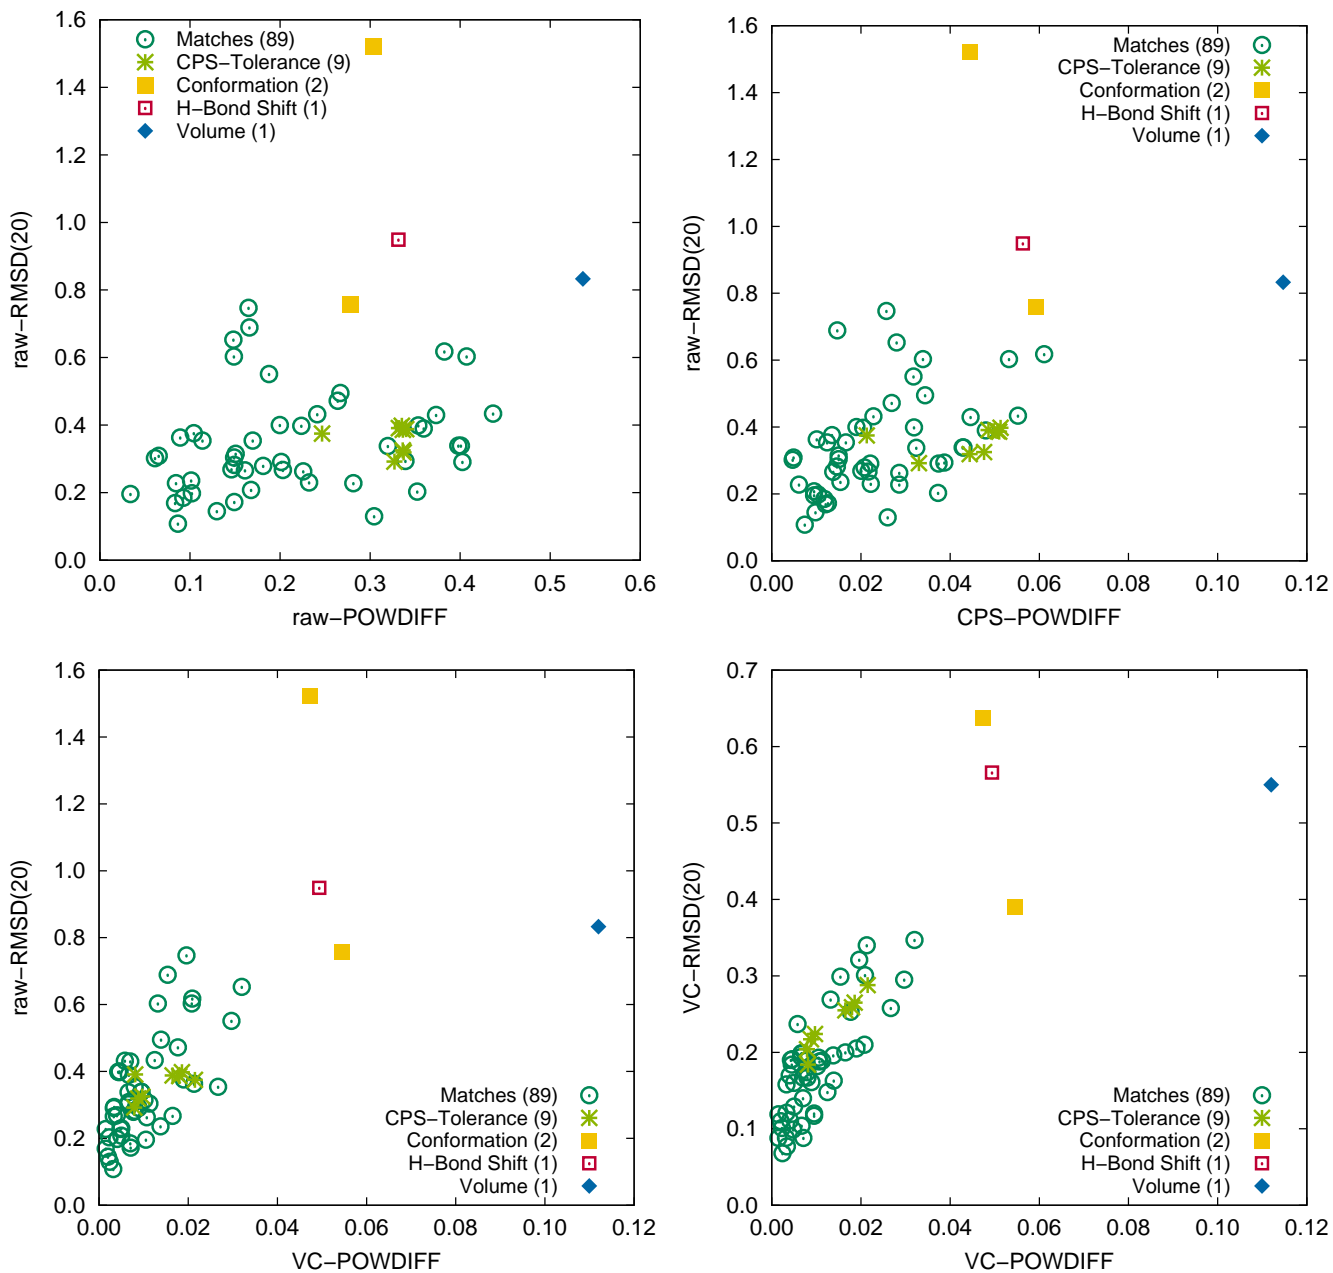

## S11 Results for the Set of 113 Structures

Table S7: Summary of results for the 113-structure set. For each structure, we indicate if it was a BT6 match (Yes/No). We additionally categorize each structure according to the labels used in Figures 3-5 in the manuscript. RMSDs are given in Å, tolerances in % and degrees.  $\Delta V$  is the percent volume difference between the candidate and target structures, which is equivalent in magnitude (opposite in sign) to the percent volume correction. RMSD(1) values are only given for structures with  $Z' = 1$ .

| Structure          | BT6 Match | Category        | RMSD(1) | VC-RMSD(1) | Raw-RMSD(1) | Tolerance | VC-RMSD(20) | Tolerance | Raw-RMSD(20) | CPS-POWDIFF | VC-POWDIFF | $\Delta V$ |
|--------------------|-----------|-----------------|---------|------------|-------------|-----------|-------------|-----------|--------------|-------------|------------|------------|
| XXII-G03-L1-E03    | Y         | match           | 0.042   | 0.050      | 0.203       | 20        | 0.101       | 20        | 0.3523       | 0.0373      | 0.0023     | -4.17      |
| XXII-G03-L1-E56    | N         | XXII polytype   | 0.087   | 0.074      | —           | —         | —           | —         | 0.3229       | 0.0287      | 0.0171     | -2.10      |
| XXII-G04-L1-E01    | Y         | match           | 0.059   | 0.058      | 0.198       | 20        | 0.111       | 20        | 0.1021       | 0.0104      | 0.0041     | 2.73       |
| XXII-G04-L1-E47    | N         | XXII polytype   | 0.059   | 0.084      | —           | —         | —           | —         | 0.2203       | 0.0355      | 0.0196     | 6.44       |
| XXII-G05-L1-E04    | Y         | match           | 0.050   | 0.072      | 0.279       | 20        | 0.189       | 20        | 0.1813       | 0.0208      | 0.0077     | -0.39      |
| XXII-G05-L1-E77    | N         | XXII polytype   | 0.061   | 0.157      | —           | —         | —           | —         | 0.3592       | 0.0430      | 0.0406     | 1.63       |
| XXII-G07-L1-E09    | Y         | match           | 0.112   | 0.122      | 0.196       | 20        | 0.193       | 20        | 0.0339       | 0.0095      | 0.0105     | 0.44       |
| XXII-G07-L1-E91    | N         | XXII polytype   | 0.127   | 0.123      | —           | —         | —           | —         | 0.2313       | 0.0293      | 0.0191     | 2.29       |
| XXII-G09-L1-E02    | Y         | Volume          | 0.048   | 0.180      | 0.833       | 25        | 0.550       | 25        | 0.5363       | 0.1147      | 0.1120     | 14.72      |
| XXII-G13-L1-E01    | Y         | match           | 0.081   | 0.114      | 0.236       | 20        | 0.196       | 20        | 0.1013       | 0.0154      | 0.0138     | 1.26       |
| XXII-G14-L1-E02    | Y         | match           | 0.040   | 0.044      | 0.130       | 20        | 0.068       | 20        | 0.3045       | 0.0260      | 0.0024     | 4.40       |
| XXII-G14-L1-E42    | N         | XXII polytype   | 0.074   | 0.078      | —           | —         | —           | —         | 0.2931       | 0.0435      | 0.0238     | 5.34       |
| XXII-G15-L1-E06    | Y         | match           | 0.066   | 0.082      | 0.291       | 20        | 0.158       | 20        | 0.4025       | 0.0374      | 0.0033     | -1.72      |
| XXII-G15-L1-E91    | Y         | match           | 0.110   | 0.102      | 0.267       | 20        | 0.200       | 20        | 0.2031       | 0.0217      | 0.0165     | 3.21       |
| XXII-G18-L1-E06    | Y         | match           | 0.041   | 0.085      | 0.269       | 20        | 0.170       | 20        | 0.1461       | 0.0201      | 0.0040     | 1.27       |
| XXII-G18-L1-E91    | N         | XXII polytype   | 0.058   | 0.083      | —           | —         | —           | —         | 0.1200       | 0.0211      | 0.0284     | 2.74       |
| XXII-G18-L2-E02    | Y         | match           | 0.048   | 0.070      | 0.230       | 20        | 0.129       | 20        | 0.2323       | 0.0222      | 0.0050     | 5.38       |
| XXII-G18-L2-E19    | N         | XXII polytype*  | 0.055   | 0.081      | —           | —         | —           | —         | 0.3217       | 0.0398      | 0.0236     | 7.18       |
| XXII-G20-L1-E04    | Y         | match           | 0.101   | 0.110      | 0.185       | 20        | 0.167       | 20        | 0.0927       | 0.0118      | 0.0070     | 2.49       |
| XXII-G21-L1-E03    | Y         | match           | 0.045   | 0.103      | 0.338       | 20        | 0.198       | 20        | 0.3197       | 0.0324      | 0.0066     | 0.48       |
| XXII-G21-L1-E39    | N         | XXII polytype   | 0.047   | 0.099      | —           | —         | —           | —         | 0.1510       | 0.0248      | 0.0274     | 3.04       |
| XXII-G23-L1-E52    | N         | XXII polytype   | 0.069   | 0.101      | —           | —         | —           | —         | 0.2564       | 0.0408      | 0.0345     | -5.23      |
| XXII-G23-L2-E13    | N         | XXII polytype   | 0.061   | 0.061      | —           | —         | —           | —         | 0.0607       | 0.0137      | 0.0199     | -1.11      |
| XXII-G25-L1-E03    | Y         | match           | 0.025   | 0.042      | 0.169       | 20        | 0.119       | 20        | 0.0835       | 0.0121      | 0.0015     | 3.10       |
| XXII-G25-L1-E18    | N         | XXII polytype   | 0.069   | 0.071      | —           | —         | —           | —         | 0.2522       | 0.0368      | 0.0230     | 4.11       |
| XXIII-A-G03-L1-E23 | Y         | match           | 0.180   | 0.187      | 0.354       | 20        | 0.258       | 20        | 0.1139       | 0.0124      | 0.0267     | 1.98       |
| XXIII-A-G05-L1-E83 | Y         | match           | 0.177   | 0.194      | 0.689       | 20        | 0.299       | 20        | 0.1660       | 0.0147      | 0.0154     | 2.73       |
| XXIII-A-G09-L2-E19 | N         | missed match    | 0.185   | 0.202      | 0.511       | 20        | 0.295       | 20        | 0.1877       | 0.0318      | 0.0297     | 8.68       |
| XXIII-A-G14-L1-E26 | Y         | match           | 0.069   | 0.077      | 0.145       | 20        | 0.110       | 20        | 0.1299       | 0.0098      | 0.0020     | -1.86      |
| XXIII-A-G15-L1-E70 | Y         | match           | 0.231   | 0.287      | 0.653       | 20        | 0.347       | 20        | 0.1482       | 0.0280      | 0.0320     | -2.25      |
| XXIII-B-G03-L2-E75 | Y         | match           | 0.253   | 0.249      | 0.618       | 20        | 0.301       | 20        | 0.3825       | 0.0611      | 0.0209     | 4.44       |
| XXIII-B-G05-L1-E20 | Y         | match           | 0.131   | 0.100      | 0.430       | 20        | 0.140       | 20        | 0.3733       | 0.0446      | 0.0070     | 2.35       |
| XXIII-B-G06-L1-E26 | N         | duplicate match | 0.162   | 0.155      | 0.442       | 20        | 0.183       | 20        | 0.4282       | 0.0550      | 0.0157     | 0.35       |
| XXIII-B-G06-L1-E78 | Y         | match           | 0.147   | 0.123      | 0.434       | 20        | 0.148       | 20        | 0.4366       | 0.0552      | 0.0125     | 0.04       |
| XXIII-B-G09-L1-E13 | Y         | match           | 0.143   | 0.123      | 0.495       | 20        | 0.163       | 20        | 0.2670       | 0.0344      | 0.0139     | 7.28       |
| XXIII-B-G09-L1-E46 | N         | duplicate match | 0.187   | 0.174      | 0.434       | 20        | 0.188       | 20        | 0.2229       | 0.0311      | 0.0174     | 7.44       |
| XXIII-B-G13-L1-E88 | Y         | conformation    | 0.339   | 0.320      | 0.758       | 30        | 0.390       | 25        | 0.2783       | 0.0593      | 0.0546     | 9.19       |
| XXIII-B-G14-L1-E02 | Y         | match           | 0.092   | 0.075      | 0.228       | 20        | 0.099       | 20        | 0.2814       | 0.0286      | 0.0048     | -3.50      |
| XXIII-B-G14-L1-E89 | N         | duplicate match | 0.089   | 0.080      | 0.192       | 20        | 0.090       | 20        | 0.2629       | 0.0227      | 0.0039     | -3.23      |
| XXIII-B-G15-L1-E13 | Y         | match           | 0.179   | 0.164      | 0.603       | 20        | 0.210       | 20        | 0.4071       | 0.0532      | 0.0208     | -1.23      |
| XXIII-B-G15-L1-E21 | N         | duplicate match | 0.216   | 0.225      | 0.455       | 20        | 0.248       | 20        | 0.3885       | 0.0411      | 0.0126     | -1.67      |
| XXIII-B-G18-L1-E01 | Y         | match           | 0.132   | 0.104      | 0.339       | 20        | 0.120       | 20        | 0.3980       | 0.0428      | 0.0095     | -1.91      |
| XXIII-B-G18-L1-E05 | Y         | duplicate match | 0.182   | 0.164      | 0.285       | 20        | 0.179       | 20        | 0.3609       | 0.0307      | 0.0075     | -2.46      |
| XXIII-B-G18-L2-E02 | Y         | match           | 0.132   | 0.102      | 0.339       | 20        | 0.117       | 20        | 0.4008       | 0.0430      | 0.0095     | -2.03      |
| XXIII-B-G23-L1-E11 | Y         | CPS-tolerance   | 0.223   | 0.237      | 0.388       | 35        | 0.255       | 40        | 0.3400       | 0.0506      | 0.0165     | -7.53      |
| XXIII-B-G23-L1-E14 | N         | CPS-tolerance   | 0.224   | 0.233      | 0.386       | 40        | 0.259       | 40        | 0.3364       | 0.0510      | 0.0180     | -7.75      |
| XXIII-B-G23-L1-E17 | N         | CPS-tolerance   | 0.229   | 0.240      | 0.398       | 30        | 0.265       | 30        | 0.3352       | 0.0513      | 0.0186     | -7.74      |
| XXIII-B-G23-L1-E26 | N         | duplicate match | 0.178   | 0.160      | 0.391       | 25        | 0.184       | 25        | 0.3320       | 0.0486      | 0.0081     | -7.41      |
| XXIII-B-G23-L1-E31 | N         | duplicate match | 0.114   | 0.080      | 0.393       | 20        | 0.110       | 20        | 0.3175       | 0.0475      | 0.0052     | -6.97      |
| XXIII-B-G23-L1-E32 | N         | duplicate match | 0.120   | 0.072      | 0.421       | 20        | 0.092       | 20        | 0.3196       | 0.0474      | 0.0054     | -7.17      |
| XXIII-B-G23-L1-E34 | N         | duplicate match | 0.120   | 0.073      | 0.417       | 20        | 0.094       | 20        | 0.3195       | 0.0472      | 0.0054     | -7.15      |
| XXIII-B-G23-L1-E36 | N         | duplicate match | 0.120   | 0.074      | 0.419       | 20        | 0.094       | 20        | 0.3182       | 0.0469      | 0.0055     | -7.13      |
| XXIII-B-G23-L1-E37 | N         | duplicate match | 0.122   | 0.077      | 0.402       | 20        | 0.100       | 20        | 0.3211       | 0.0476      | 0.0053     | -7.14      |
| XXIII-B-G23-L1-E38 | N         | duplicate match | 0.111   | 0.080      | 0.405       | 20        | 0.108       | 20        | 0.3154       | 0.0466      | 0.0048     | -6.95      |
| XXIII-B-G23-L1-E39 | N         | duplicate match | 0.121   | 0.076      | 0.412       | 20        | 0.097       | 20        | 0.3206       | 0.0474      | 0.0055     | -7.10      |

Continued on next page...

| Structure        | BTG Match | Category        | RMSD(1) | VC-RMSD(1) | Raw-RMSD(1) | Tolerance | VC-RMSD(20) | Tolerance | Raw-RMSD(20) | Tolerance | CPS-POWDIFF | VC-POWDIFF | $\Delta V$ |
|------------------|-----------|-----------------|---------|------------|-------------|-----------|-------------|-----------|--------------|-----------|-------------|------------|------------|
| XXIIB-G23-L1-E42 | N         | duplicate match | 0.124   | 0.072      | 0.437       | 20        | 0.091       | 20        | 0.3160       | 0.0466    | 0.0056      | -7.06      |            |
| XXIIB-G23-L1-E44 | N         | duplicate match | 0.125   | 0.073      | 0.447       | 20        | 0.094       | 20        | 0.3163       | 0.0457    | 0.0059      | -6.92      |            |
| XXIIB-G23-L1-E45 | N         | duplicate match | 0.120   | 0.075      | 0.408       | 20        | 0.096       | 20        | 0.3204       | 0.0474    | 0.0054      | -7.06      |            |
| XXIIB-G23-L1-E46 | N         | duplicate match | 0.119   | 0.068      | 0.423       | 20        | 0.089       | 20        | 0.3245       | 0.0474    | 0.0055      | -7.01      |            |
| XXIIB-G23-L1-E47 | N         | duplicate match | 0.121   | 0.076      | 0.425       | 20        | 0.098       | 20        | 0.3167       | 0.0457    | 0.0051      | -6.99      |            |
| XXIIB-G23-L1-E52 | N         | duplicate match | 0.123   | 0.072      | 0.434       | 20        | 0.095       | 20        | 0.3228       | 0.0467    | 0.0057      | -6.92      |            |
| XXIIB-G23-L1-E56 | N         | duplicate match | 0.123   | 0.076      | 0.428       | 20        | 0.096       | 20        | 0.3188       | 0.0459    | 0.0053      | -6.95      |            |
| XXIIB-G23-L1-E57 | N         | duplicate match | 0.123   | 0.075      | 0.416       | 20        | 0.096       | 20        | 0.3214       | 0.0466    | 0.0052      | -6.96      |            |
| XXIIB-G23-L1-E59 | N         | duplicate match | 0.127   | 0.076      | 0.426       | 20        | 0.095       | 20        | 0.3227       | 0.0469    | 0.0055      | -6.96      |            |
| XXIIB-G23-L1-E61 | N         | duplicate match | 0.124   | 0.070      | 0.425       | 20        | 0.090       | 20        | 0.3278       | 0.0479    | 0.0056      | -6.97      |            |
| XXIIB-G23-L2-E01 | Y         | match           | 0.124   | 0.083      | 0.390       | 20        | 0.104       | 20        | 0.3595       | 0.0480    | 0.0067      | -5.62      |            |
| XXIIB-G23-L2-E02 | Y         | duplicate match | 0.104   | 0.059      | 0.349       | 20        | 0.078       | 20        | 0.3190       | 0.0465    | 0.0045      | -6.31      |            |
| XXIIB-G23-L2-E03 | N         | duplicate match | 0.102   | 0.056      | 0.368       | 20        | 0.076       | 20        | 0.3175       | 0.0452    | 0.0044      | -6.32      |            |
| XXIIB-G23-L2-E04 | N         | duplicate match | 0.094   | 0.062      | 0.330       | 20        | 0.090       | 20        | 0.3052       | 0.0439    | 0.0038      | -6.28      |            |
| XXIIB-G23-L2-E05 | N         | duplicate match | 0.119   | 0.075      | 0.413       | 20        | 0.104       | 20        | 0.3600       | 0.0471    | 0.0052      | -5.64      |            |
| XXIIB-G23-L2-E06 | N         | duplicate match | 0.111   | 0.062      | 0.395       | 20        | 0.088       | 20        | 0.3331       | 0.0445    | 0.0046      | -5.94      |            |
| XXIIB-G23-L2-E07 | N         | duplicate match | 0.128   | 0.081      | 0.411       | 20        | 0.105       | 20        | 0.3746       | 0.0485    | 0.0072      | -5.42      |            |
| XXIIB-G23-L2-E08 | N         | duplicate match | 0.115   | 0.103      | 0.334       | 20        | 0.132       | 20        | 0.3534       | 0.0485    | 0.0048      | -6.28      |            |
| XXIIB-G23-L2-E15 | N         | CPS-tolerance   | 0.202   | 0.215      | 0.325       | 35        | 0.224       | 35        | 0.3362       | 0.0476    | 0.0097      | -6.52      |            |
| XXIIB-G23-L2-E19 | N         | CPS-tolerance   | 0.198   | 0.206      | 0.319       | 30        | 0.217       | 35        | 0.3372       | 0.0444    | 0.0088      | -6.23      |            |
| XXIIB-G25-L1-E02 | Y         | match           | 0.093   | 0.052      | 0.294       | 20        | 0.077       | 20        | 0.3392       | 0.0387    | 0.0034      | -4.48      |            |
| XXIIB-G25-L1-E10 | Y         | CPS-tolerance   | 0.202   | 0.202      | 0.292       | 35        | 0.204       | 35        | 0.3270       | 0.0330    | 0.0079      | -4.21      |            |
| XXIIC-G14-L2-E06 | Y         | match           | —       | —          | 0.208       | 20        | 0.160       | 20        | 0.1678       | 0.0095    | 0.0050      | -3.38      |            |
| XXIIC-G14-L2-E25 | Y         | conformation    | —       | —          | —           | —         | —           | —         | 0.2305       | 0.0197    | 0.0357      | -3.11      |            |
| XXIID-G03-L1-E75 | Y         | CPS-tolerance   | 0.225   | 0.223      | 0.375       | 25        | 0.288       | 25        | 0.2467       | 0.0213    | 0.0215      | 3.98       |            |
| XXIID-G06-L1-E73 | Y         | match           | 0.220   | 0.261      | 0.747       | 20        | 0.321       | 20        | 0.747        | 0.0257    | 0.0196      | 0.95       |            |
| XXIID-G06-L1-E75 | N         | duplicate match | 0.220   | 0.261      | 0.763       | 20        | 0.321       | 20        | 0.1650       | 0.0257    | 0.0196      | 0.95       |            |
| XXIID-G09-L1-E66 | Y         | match           | 0.239   | 0.211      | 0.603       | 20        | 0.269       | 20        | 0.1487       | 0.0339    | 0.0132      | 7.00       |            |
| XXIID-G14-L1-E11 | Y         | match           | 0.130   | 0.138      | 0.432       | 20        | 0.237       | 20        | 0.2413       | 0.0228    | 0.0058      | -2.68      |            |
| XXIID-G18-L1-E85 | Y         | match           | 0.108   | 0.134      | 0.400       | 20        | 0.191       | 20        | 0.1997       | 0.0190    | 0.0046      | -0.94      |            |
| XXIID-G18-L1-E99 | N         | duplicate match | 0.120   | 0.146      | 0.349       | 20        | 0.175       | 20        | 0.0842       | 0.0115    | 0.0092      | -0.02      |            |
| XXIID-G18-L2-E44 | Y         | match           | 0.108   | 0.133      | 0.398       | 20        | 0.184       | 20        | 0.2236       | 0.0205    | 0.0045      | -1.36      |            |
| XXIID-G25-L1-E14 | Y         | match           | 0.113   | 0.118      | 0.399       | 20        | 0.190       | 20        | 0.3535       | 0.0319    | 0.0043      | -3.62      |            |
| XXIV-G14-L1-E02  | Y         | match           | —       | —          | 0.172       | 20        | 0.088       | 20        | 0.1492       | 0.0126    | 0.0071      | -0.34      |            |
| XXV-G05-L1-E01   | Y         | match           | —       | —          | 0.472       | 20        | 0.253       | 20        | 0.2640       | 0.0269    | 0.0177      | 0.68       |            |
| XXV-G05-L1-E02   | N         | duplicate match | —       | —          | 0.432       | 20        | 0.234       | 20        | 0.1875       | 0.0226    | 0.0159      | 0.86       |            |
| XXV-G05-L1-E03   | N         | duplicate match | —       | —          | 0.425       | 20        | 0.228       | 20        | 0.1821       | 0.0218    | 0.0155      | 0.89       |            |
| XXV-G06-L1-E08   | N         | missed match    | —       | —          | 0.363       | 60        | 0.340       | 60        | 0.0892       | 0.0101    | 0.0213      | -1.98      |            |
| XXV-G14-L1-E06   | Y         | match           | —       | —          | 0.108       | 20        | 0.088       | 20        | 0.0866       | 0.0074    | 0.0032      | -2.30      |            |
| XXV-G15-L1-E01   | Y         | match           | —       | —          | 0.354       | 20        | 0.167       | 20        | 0.1697       | 0.0166    | 0.0080      | 0.18       |            |
| XXV-G15-L1-E24   | N         | H-bond shift    | —       | —          | 0.949       | 35        | 0.566       | 35        | 0.3314       | 0.0563    | 0.0494      | 4.20       |            |
| XXV-G18-L1-E01   | Y         | match           | —       | —          | 0.315       | 20        | 0.182       | 20        | 0.1507       | 0.0150    | 0.0102      | -0.54      |            |
| XXV-G18-L2-E01   | Y         | match           | —       | —          | 0.304       | 20        | 0.189       | 20        | 0.1491       | 0.0150    | 0.0113      | -1.07      |            |
| XXV-G21-L1-E02   | Y         | match           | —       | —          | 0.291       | 20        | 0.161       | 20        | 0.2013       | 0.0221    | 0.0089      | -5.22      |            |
| XXV-G23-L1-E02   | Y         | match           | —       | —          | 0.263       | 20        | 0.188       | 20        | 0.2258       | 0.0286    | 0.0107      | -6.27      |            |
| XXV-G25-L1-E01   | Y         | match           | —       | —          | 0.282       | 20        | 0.174       | 20        | 0.1492       | 0.0146    | 0.0080      | -2.11      |            |
| XXVI-G06-L1-E08  | Y         | match           | 0.185   | 0.168      | 0.376       | 20        | 0.205       | 20        | 0.1043       | 0.0135    | 0.0190      | 2.52       |            |
| XXVI-G06-L1-E14  | N         | duplicate match | 0.182   | 0.165      | 0.384       | 20        | 0.200       | 20        | 0.1043       | 0.0133    | 0.0175      | 2.49       |            |
| XXVI-G06-L1-E16  | N         | duplicate match | 0.182   | 0.165      | 0.375       | 20        | 0.200       | 20        | 0.1030       | 0.0132    | 0.0175      | 2.49       |            |
| XXVI-G06-L2-E01  | Y         | match           | 0.096   | 0.085      | 0.266       | 20        | 0.121       | 20        | 0.1611       | 0.0138    | 0.0033      | -4.03      |            |
| XXVI-G06-L2-E02  | N         | duplicate match | 0.059   | 0.082      | 0.250       | 20        | 0.127       | 20        | 0.1418       | 0.0126    | 0.0037      | -3.96      |            |
| XXVI-G06-L2-E03  | N         | duplicate match | 0.071   | 0.078      | 0.262       | 20        | 0.132       | 20        | 0.1528       | 0.0115    | 0.0036      | -4.01      |            |
| XXVI-G06-L2-E04  | N         | duplicate match | 0.048   | 0.090      | 0.234       | 20        | 0.146       | 20        | 0.1272       | 0.0097    | 0.0054      | -4.04      |            |
| XXVI-G06-L2-E05  | N         | duplicate match | 0.138   | 0.136      | 0.376       | 20        | 0.177       | 20        | 0.1880       | 0.0195    | 0.0057      | -3.76      |            |
| XXVI-G14-L1-E01  | Y         | match           | 0.080   | 0.061      | 0.228       | 20        | 0.088       | 20        | 0.0845       | 0.0061    | 0.0015      | -1.90      |            |
| XXVI-G14-L1-E03  | Y         | duplicate match | 0.232   | 0.267      | 0.770       | 20        | 0.401       | 20        | 0.1409       | 0.0183    | 0.0208      | -1.58      |            |
| XXVI-G14-L1-E06  | N         | conformation    | 0.561   | 0.441      | 1.522       | 45        | 0.637       | 30        | 0.3037       | 0.0444    | 0.0473      | -2.20      |            |
| XXVI-G18-L1-E02  | Y         | match           | 0.125   | 0.139      | 0.302       | 20        | 0.194       | 20        | 0.0612       | 0.0047    | 0.0066      | 0.25       |            |
| XXVI-G18-L2-E01  | Y         | match           | 0.125   | 0.141      | 0.309       | 20        | 0.199       | 20        | 0.0653       | 0.0049    | 0.0067      | -0.04      |            |

\* This structure has a space group of P<sub>2</sub>/c, while the other polytype structures are all P<sub>2</sub>/c, and can only be identified if the space-group option is deselected in the structure screening.
